# Supplementary material
Source: Springer Nature journal article supplement (https://www.springermedizin.de/resource/supplementary/12913_2011_1976_MOESM1_ESM.pdf/9530670)
Supplement: MOESM1 [file 9530670]

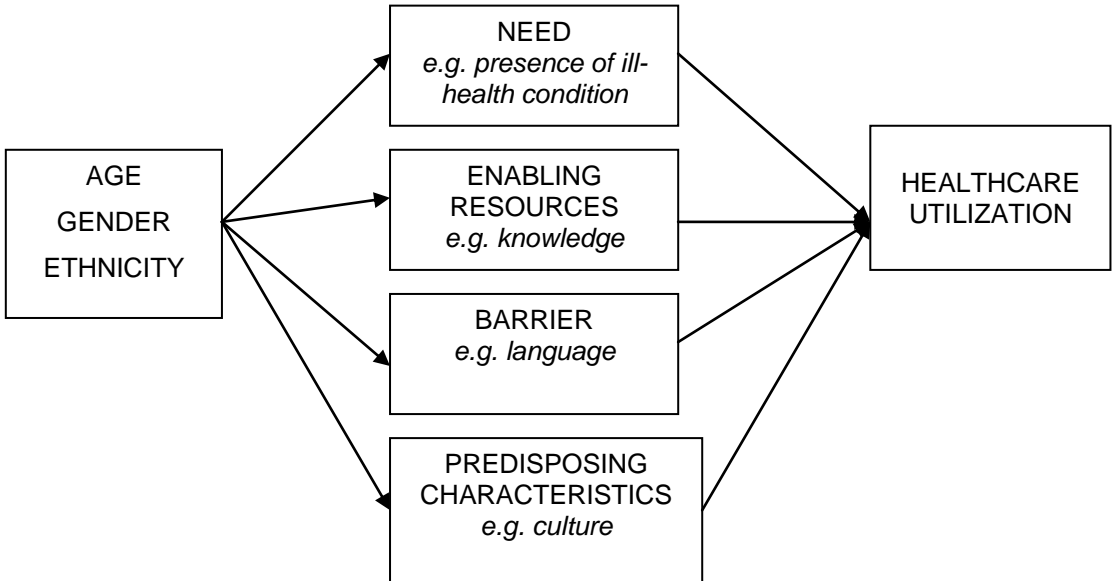

AGE  
GENDER  
ETHNICITY

NEED  
*e.g. presence of ill-  
health condition*

ENABLING  
RESOURCES  
*e.g. knowledge*

BARRIER  
*e.g. language*

PREDISPOSING  
CHARACTERISTICS  
*e.g. culture*

HEALTHCARE  
UTILIZATION
